# Supplementary material for: [BMIM]BF4-modified PVDF-HFP composite polymer electrolyte for high-performance solid-state lithium metal battery
Source: Royal Society of Chemistry journal article supplement (doi:10.1039/d0ta08169h), 2020-01-01
Supplement: d0ta08169h1.pdf [file d0ta08169h1.pdf]

1

2

## Supporting information

3

4 **[BMIM]BF<sub>4</sub> modified PVDF-HFP composite polymer electrolyte**

5 **for high-performance solid-state lithium metal battery**

6

7 Kaixiong Huang,<sup>a</sup> Yanyi Wang,<sup>a</sup> Hongwei Mi,<sup>a</sup> Dingtao Ma,<sup>a</sup> Bo Yong<sup>a</sup> and Peixin

8 Zhang\*<sup>a</sup>

9

10 <sup>a</sup> College of Chemistry and Environmental Engineering, Shenzhen University,  
11 Shenzhen 518060, China.

12 E-mail: pxzhang@szu.edu.cn

13

14

15

16

17

18

19

20

21

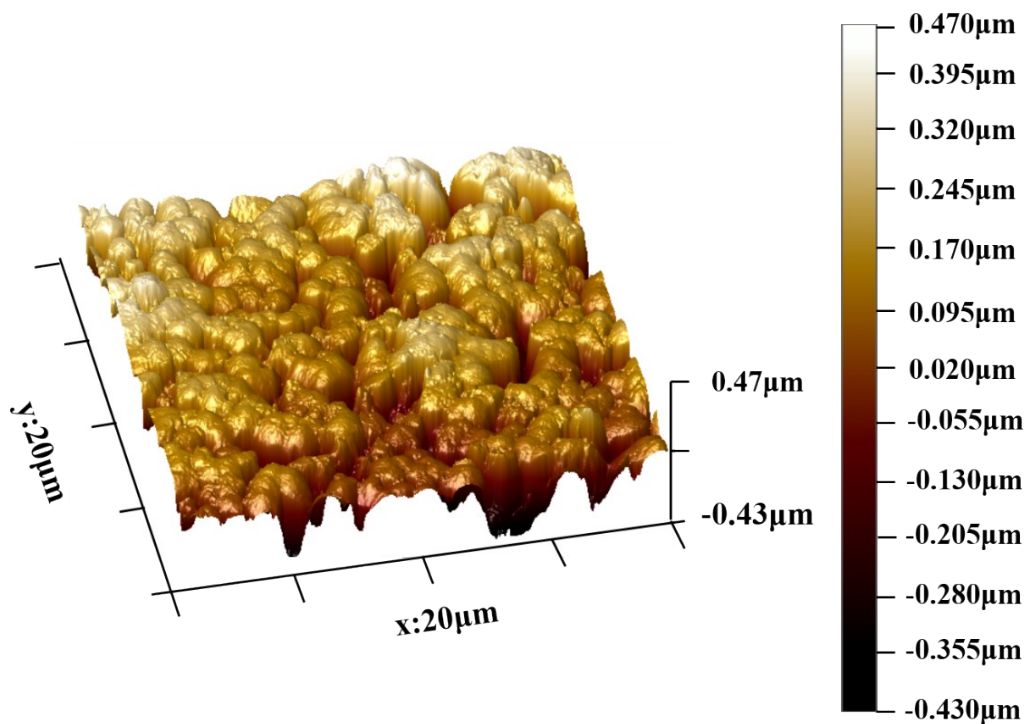

1  
2 **Figure S1.** Atomic force microscope (AFM) photograph of PPEB212 electrolyte.

3  
4  
5

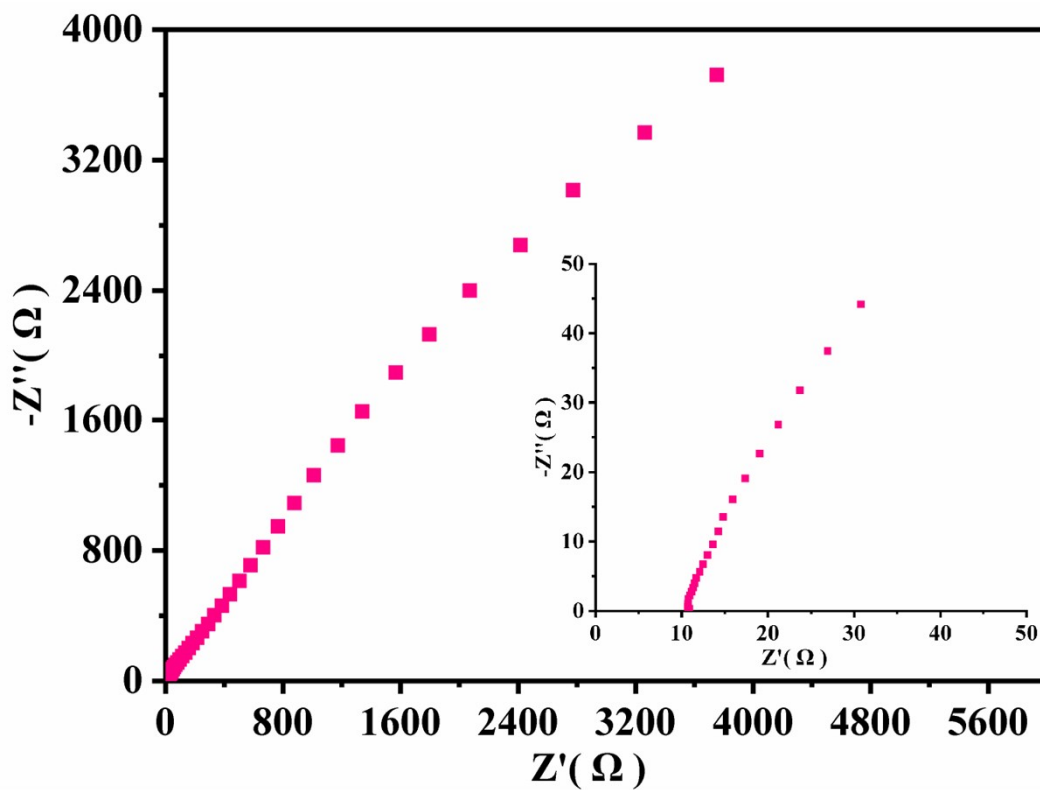

6  
7 **Figure S2.** Impedance measurement of solid polymer electrolyte that only consist of  
8 PVDF-HFP, LiTFSI and [BMIM]BF<sub>4</sub>.

1

2 The ionic conductivity of solid polymer electrolyte that only consist of PVDF-

3 HFP, LiTFSI and [BMIM]BF<sub>4</sub> was calculated to be about  $7.07 \times 10^{-4} \text{ S cm}^{-1}$  at 25°C.

4

5

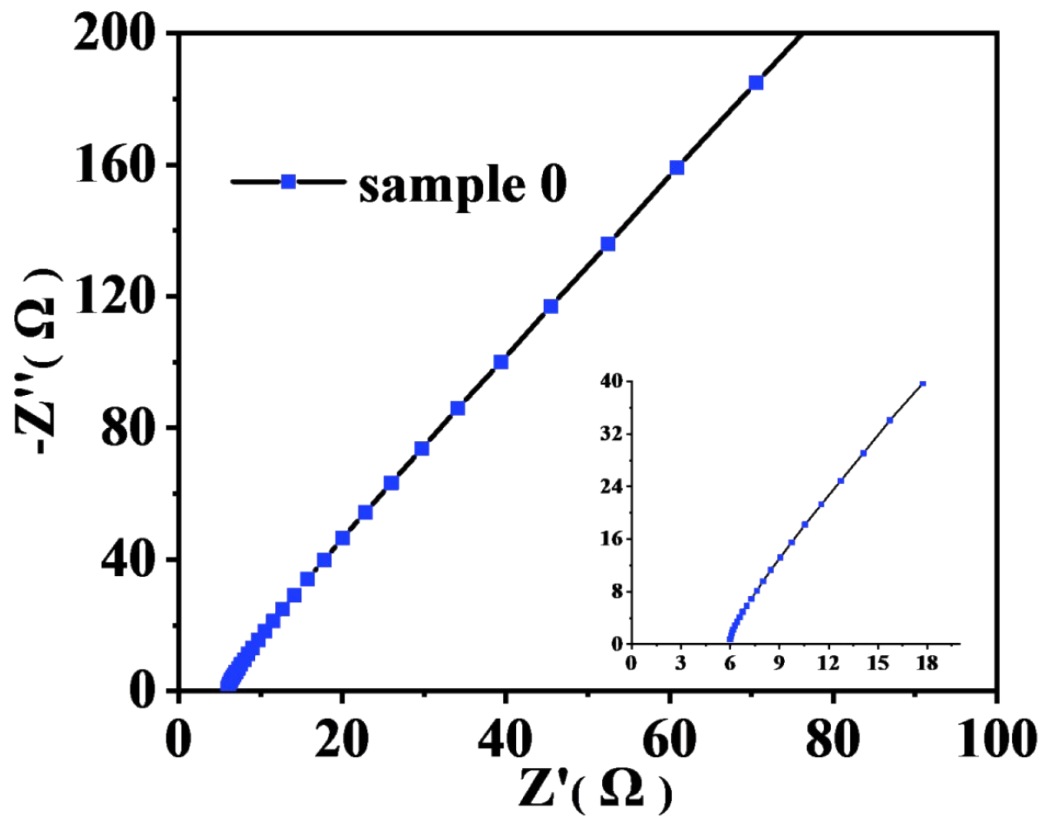

6

7 **Figure S3.** The impedance spectra of sample 0 at 25 °C. The sample 0 (PVDF-HFP:

8 LiTFSI : PC : EC = 1.0 g : 0.4 g : 1.0 g : 0.5 g) shows a general ionic conductivity of

9  $1.76 \text{ mS cm}^{-1}$ .

10

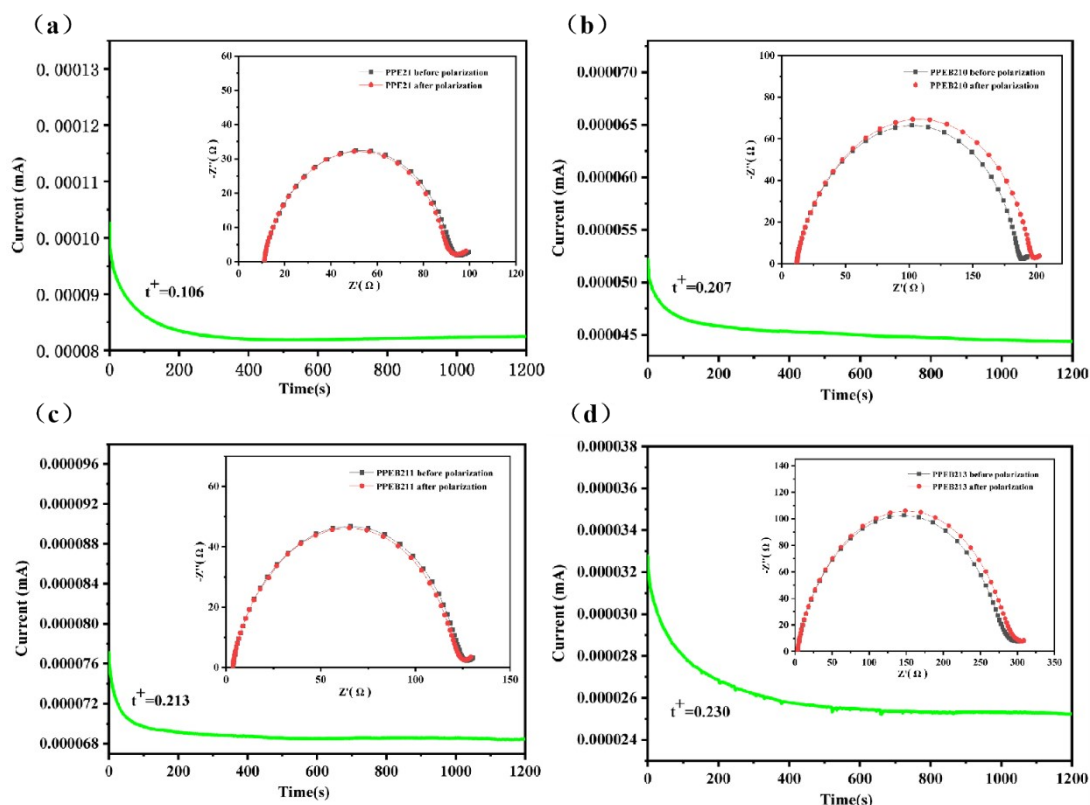

1

2 **Figure S4.** Li-ion transference number ( $t_{Li^+}$ ) of (a) PPE21, (b)PPEB210, (c)PPEB211,  
 3 and (d) PPEB213.

4

5

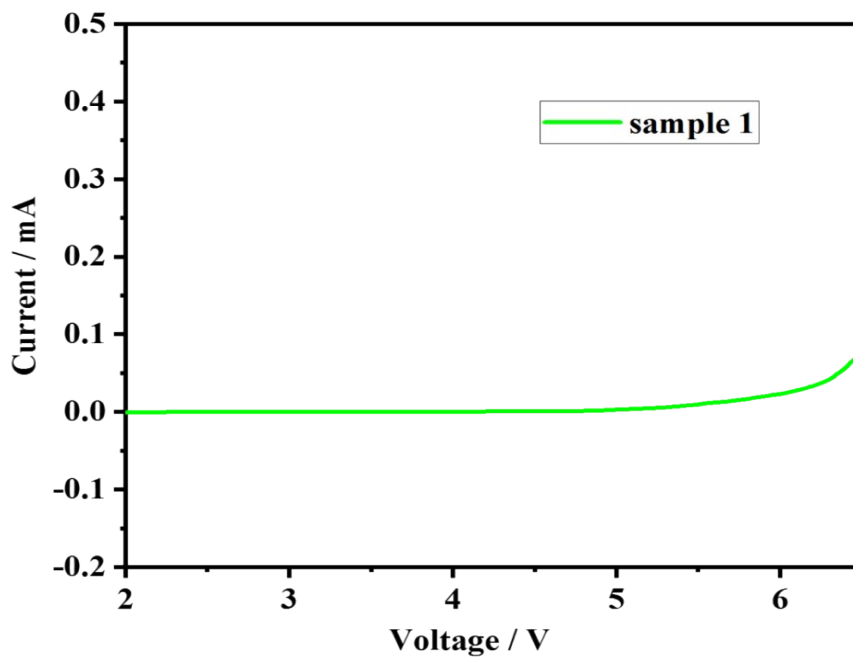

6

7 **Figure S5.** Linear sweep voltammograms of the sample 1(continue adding 0.4 g LiTFSI  
 8 in PPEB212) sample 1 shows a higher decomposition potential of 5.8V.

1

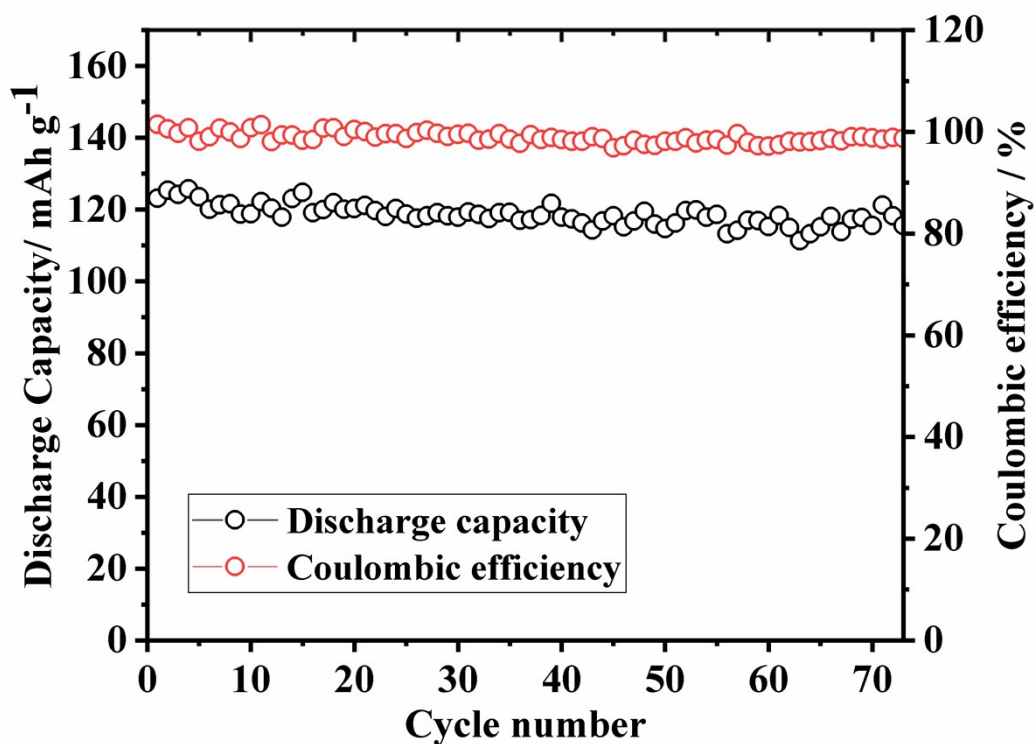

2

3 **Figure S6.** Electrochemical performance of solid polymer electrolyte that only consist  
4 of PVDF-HFP, LiTFSI and [BMIM]BF<sub>4</sub> at 0.2 C.

5

6 The battery constructed of the above-mentioned solid polymer electrolyte shows a  
7 lower discharge capacity of 120 mAh g<sup>-1</sup>, which implies that the high viscosity  
8 [BMIM]BF<sub>4</sub> is not suitable for polymer electrolyte lonely.

9

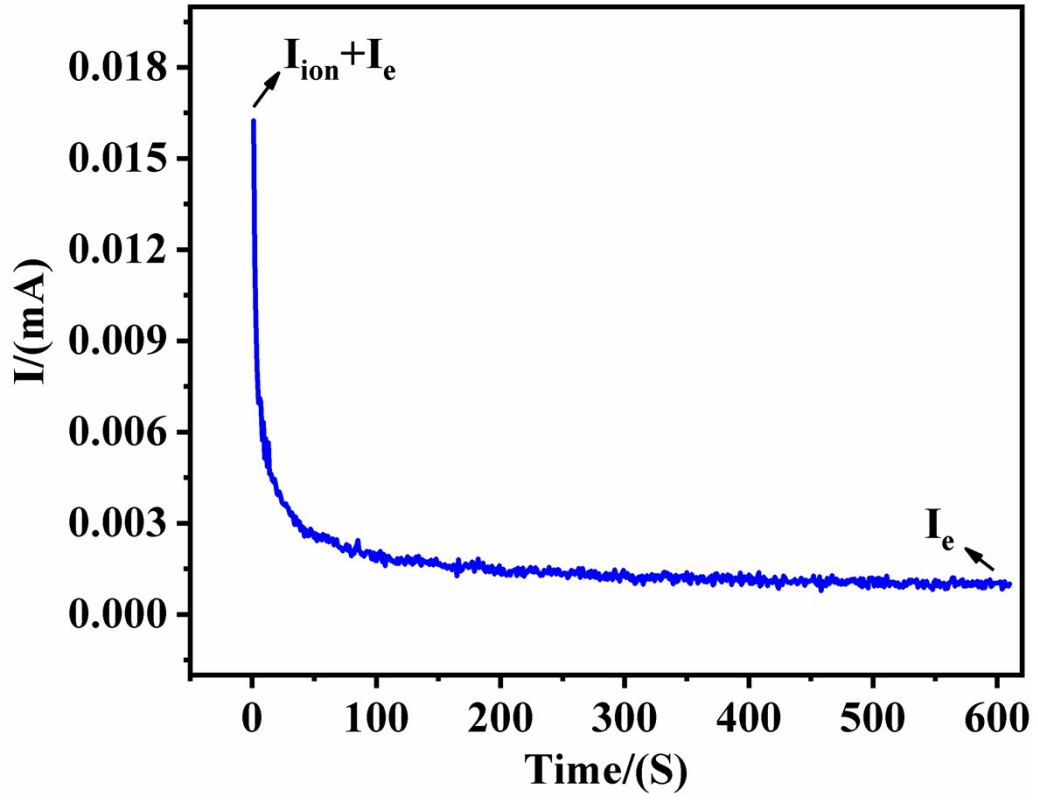

1

2 **Figure S7.** The plot of direct current (DC) test.

3

4

5

6

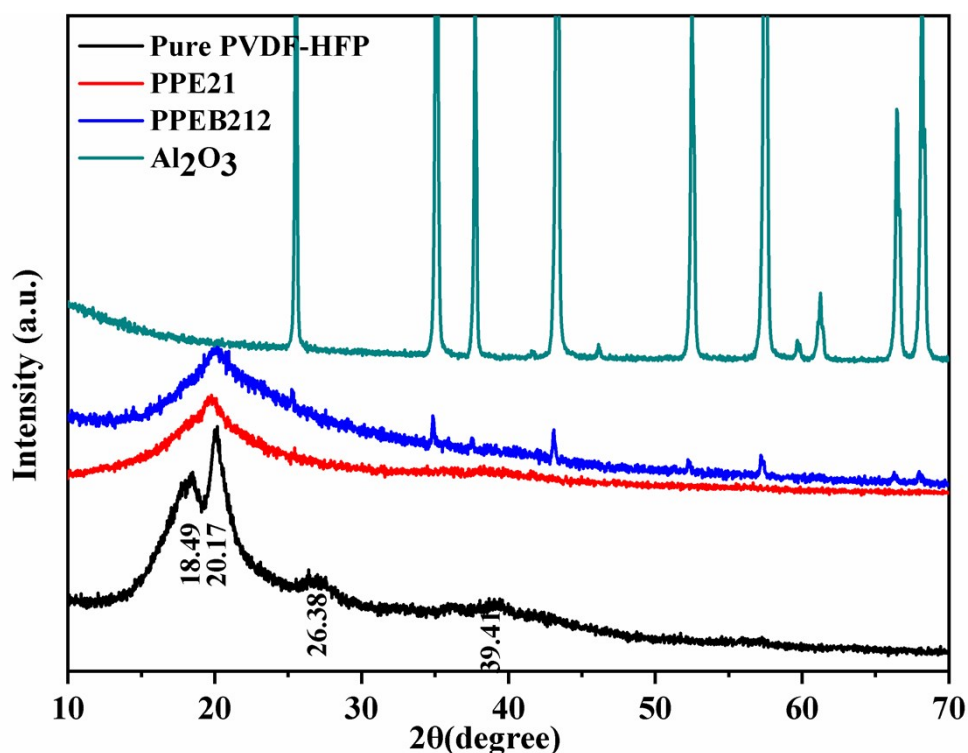

1

2 **Figure S8.** XRD patterns of the pure PVDF-HFP, Al<sub>2</sub>O<sub>3</sub> particle, PPEB21 and  
 3 PPEB212 ILCPE.

4

5 The ionic conductivity of polymer electrolyte would be greatly influenced by their  
 6 crystallinity. Generally, increasing the amorphicity of films can lead to an increment of  
 7 ionic conductivity. X-ray diffraction (XRD) was conducted to investigate the  
 8 crystallinity phase of the as-prepare membrane as shown in Figure S8. The result  
 9 obviously shows that the diffraction peaks located at around 18.5, 20.2, 26.4 and 39.4°  
 10 are corresponding to characteristic peaks of pure PVDF-HFP. After adding the  
 11 plasticizers, it can be seen that most of peaks of PPE21 disappear or become broader.  
 12 Such phenomenon indicates that the crystallinity of pure PVDF-HFP decreases with the  
 13 increasing content of plasticizers. On the other hand, after embedding the [BMIM]BF<sub>4</sub>  
 14 in the PVDF-HFP based ILCPE, the diffraction peaks at 39.41° also disappear, which  
 15 implies the further reduction of crystallinity degree of the ILCPE.

16

17

18

19

1 **Table S1.** The EIS fitting results of Li|PPEB210|LiFePO<sub>4</sub> cell after different cycling  
 2 number at room temperature.

|      | <b>R<sub>b</sub> (Ω)</b> | <b>R<sub>ct1</sub> (Ω)</b> | <b>R<sub>ct2</sub> (Ω)</b> | <b>W (Ω)</b> |
|------|--------------------------|----------------------------|----------------------------|--------------|
| 1st  | 6.347                    | 123.4                      | 0.6938                     | 113.7        |
| 3rd  | 6.382                    | 4.86                       | 128.1                      | 107.3        |
| 5th  | 6.502                    | 412.5                      | 144.8                      | 88.99        |
| 7th  | 6.336                    | 149.2                      | 26.76                      | 82.21        |
| 9th  | 6.529                    | 34.24                      | 126.7                      | 80.39        |
| 11th | 6.755                    | 168.3                      | 31.37                      | 64.4         |
| 13th | 6.765                    | 12.59                      | 166.5                      | 79.98        |
| 15th | 5.693                    | 170                        | 291.6                      | 42.08        |
| 17th | 5.502                    | 164.8                      | 0.983                      | 69.13        |
| 19th | 6.536                    | 23.08                      | 152.8                      | 66.08        |

3

4

5 **Table S2.** The EIS fitting results of Li|PPEB212|LiFePO<sub>4</sub> cell after different cycling  
 6 number at room temperature.

|      | <b>R<sub>b</sub> (Ω)</b> | <b>R<sub>ct1</sub> (Ω)</b> | <b>R<sub>ct2</sub> (Ω)</b> | <b>W (Ω)</b> |
|------|--------------------------|----------------------------|----------------------------|--------------|
| 1st  | 5.248                    | 230.8                      | 1.399                      | 135.9        |
| 3rd  | 5.752                    | 160.9                      | 98.18                      | 118.5        |
| 5th  | 5.676                    | 269.2                      | 51.4                       | 133.2        |
| 7th  | 5.527                    | 52.33                      | 292.9                      | 95.82        |
| 9th  | 5.804                    | 244.3                      | 34.93                      | 132          |
| 11th | 5.574                    | 284                        | 50.01                      | 97.97        |
| 13th | 5.516                    | 288.5                      | 223.1                      | 64.55        |
| 15th | 5.648                    | 259                        | 31.84                      | 128          |
| 17th | 5.528                    | 55.35                      | 277.7                      | 92.42        |
| 19th | 5.819                    | 263.8                      | 61.54                      | 97.25        |

7



1 **Table S3.** The comparison of electrochemical performance with the Li/LiFePO<sub>4</sub> cells  
 2 assembled with various polymer electrolyte membranes in the previous literatures.

| Samples                                                                         | Discharge capacity<br>(mAh g <sup>-1</sup> ) | Capacity<br>retention/% | Ref.      |
|---------------------------------------------------------------------------------|----------------------------------------------|-------------------------|-----------|
| PVDF-HFP/ PET/PVDF-HFP                                                          | 120 (1 C, 1st)<br>103 (1 C, 100th)           | 86                      | 1         |
| PVDF/PP microfiber                                                              | 141 (0.1 C, 1st)<br>96 (0.1 C, 50th)         | 68                      | 2         |
| PVDF-HFP/LiTFSI/LLZO                                                            | 119 (0.5 C, 1st)<br>113 (0.5 C, 150th)       | 93                      | 3         |
| PVDF-HFP/LiTFSI/LLATO/<br>Li <sub>3</sub> PO <sub>4</sub>                       | 130 (0.5 C, 1st)<br>114.7 (0.5 C, 160th)     | 87.8                    | 4         |
| PVDF-HFP porous separators                                                      | 140 (0.5 C, 1st)<br>130 (0.5 C, 100th)       | 94                      | 5         |
| PVDF-HFP/PC/EC/LiTFSI/<br>Al <sub>2</sub> O <sub>3</sub> /[BMIM]BF <sub>4</sub> | 130 (2 C, 1st)<br>124.2 (2 C, 300th)         | 95.5                    | This work |

3

#### 4 Reference

- 5 1. Y.-S. Wu, C.-C. Yang, S.-P. Luo, Y.-L. Chen, C.-N. Wei and S. J. Lue, *Int. J.*  
 6 *Hydrogen Energ.*, 2017, **42**, 6862-6875.  
 7 2. J. Hao, Q. Xiao, G. Lei, Z. Li and L. Wu, *Electrochim. Acta*, 2014, **125**, 450-456.  
 8 3. Y. Li, W. Zhang, Q. Dou, K. W. Wong and K. M. Ng, *J. Mater. Chem. A*, 2019, **7**,  
 9 3391-3398.  
 10 4. H. Yang, J. Bright, B. Chen, P. Zheng, X. Gao, B. Liu, S. Kasani, X. Zhang and N.  
 11 Wu, *J. Mater. Chem. A*, 2020, **8**, 7261-7272.  
 12 5. J. Heo, Y. Choi, K. Y. Chung and J. H. Park, *J. Mater. Chem. A*, 2016, **4**, 9496-9501.
